1 **Title:** A novel effective live-attenuated human metapneumovirus vaccine candidate produced  
2 in the serum-free suspension DuckCelt®-T17 cell platform

3

4 **Authors:** Caroline Chupin<sup>1,2,3&</sup>, Andrés Pizzorno<sup>1,3&</sup>, Aurélien Traversier<sup>1,3,5</sup>, Pauline Brun<sup>1,3,5</sup>,  
5 Daniela Ogonczyk-Makowska<sup>3,4</sup>, Blandine Padey<sup>1,3</sup>, Cédrine Milesi<sup>1,3,5</sup>, Victoria Dulière<sup>1,3,5</sup>,  
6 Emilie Laurent<sup>1,3,5</sup>, Thomas Julien<sup>1,3,5</sup>, Marie Galloux<sup>6</sup>, Bruno Lina<sup>1</sup>, Jean-François Eléouët<sup>6</sup>,  
7 Karen Moreau<sup>7</sup>, Marie-Eve Hamelin<sup>3,4</sup>, Olivier Terrier<sup>1,3</sup>, Guy Boivin<sup>3,4</sup>, Julia Dubois<sup>1,2,3#\*</sup> and  
8 Manuel Rosa-Calatrava<sup>1,3,5#\*</sup>

9 & These authors contributed equally

10 # These authors contributed equally

11 \* Corresponding authors

12

13 **Author affiliations:**

14 1- CIRI, Centre International de Recherche en Infectiologie, (Team VirPath), Univ Lyon,  
15 Inserm, U1111, Université Claude Bernard Lyon 1, CNRS, UMR5308, ENS de Lyon, F-  
16 69007, Lyon, France

17 2- Vaxxel, 43 Boulevard du onze novembre 1918, 69100, Villeurbanne, France

18 3- International Associated Laboratory RespiVir (LIA VirPath-LVMC France-Québec),  
19 Université Laval, QC G1V 4G2, Québec, Canada, Université Claude Bernard Lyon 1,  
20 Université de Lyon, 69008 Lyon, France

21 4- Centre de Recherche en Infectiologie of the Centre Hospitalier Universitaire de Québec  
22 and Université Laval, QC G1V 4G2, Canada

23 5- VirNext, Faculté de Médecine RTH Laennec, Université Claude Bernard Lyon 1,  
24 Université de Lyon, 69008 Lyon, France

25 6- Université Paris-Saclay, INRAE, UVSQ, VIM, 78350 Jouy-en-Josas, France

26 7- CIRI, Centre International de Recherche en Infectiologie, (Team STAPHPATH), Univ  
27 Lyon, Inserm, U1111, Université Claude Bernard Lyon 1, CNRS, UMR5308, ENS de Lyon,  
28 F-69007, Lyon, France

29

30 **Word count:**

31 Abstract: 248

32 Text: 669 intro / 2140 results / 869 discussion

33 Inserts: 6 figures / 1 supplementary table

34

35

36 **Abstract**

37 Human metapneumovirus (HMPV) is a major pediatric respiratory pathogen for which there  
38 is currently no specific treatment or licensed vaccine. Different strategies have been evaluated  
39 to prevent this infection, including the use of live-attenuated vaccines (LAVs). However,  
40 further development of LAV approaches is often hampered by the lack of highly efficient and  
41 scalable cell-based production systems that support worldwide vaccine production. In this  
42 context, avian cell lines cultivated in suspension are currently competing with traditional cell  
43 platforms used for viral vaccine manufacturing. We investigated whether the DuckCelt®-T17  
44 avian cell line (Vaxxel) we previously described as an efficient production system for several  
45 influenza strains could also be used to produce a new HMPV LAV candidate (Metavac®), an  
46 engineered SH gene-deleted mutant of the A1/C-85473 strain of HMPV. To that end, we  
47 characterized the operational parameters of multiplicity of infection (MOI), cell density, and  
48 trypsin addition to achieve optimal production of the LAV Metavac® in the DuckCelt®-T17  
49 cell line platform. We demonstrated that the DuckCelt®-T17 cell line is permissive and is  
50 well adapted to the production of the wild-type A1/C-85473 HMPV and the Metavac®  
51 vaccine candidate. Moreover, our results confirmed that the LAV candidate produced in  
52 DuckCelt®-T17 cells conserves its advantageous replication properties in LLC-MK2 and 3D-  
53 reconstituted human airway epithelium models, as well as its capacity to induce efficient  
54 neutralizing antibodies in a mouse model. Our results suggest that the DuckCelt®-T17 avian  
55 cell line is a very promising platform for scalable in-suspension serum-free production of the  
56 HMPV-based LAV candidate Metavac®.

57 **Key words:** DuckCelt®-T17 avian cell line, in-suspension serum-free bioproduction,  
58 production process optimization, human metapneumovirus (HMPV), live-attenuated vaccine  
59 (LAV), SH protein, gene deletion

60

## 61 **Introduction**

62 Human pneumoviruses, which include the human respiratory syncytial virus (HRSV) and the  
63 human metapneumovirus (HMPV), are a major worldwide cause of acute respiratory tract  
64 infections, especially among children, older adults, and immunocompromised individuals<sup>1-3</sup>.  
65 Infections by these two respiratory pathogens share many features and are globally  
66 responsible for more than 33 million annual cases among children under 5 years old<sup>3-5</sup>.  
67 Despite this important clinical burden, there is currently no licensed vaccine or specific  
68 antiviral against human pneumoviruses. To date, only one humanized monoclonal antibody  
69 (Palivizumab) was regulatory approved for the passive immunoprophylaxis against severe  
70 HRSV infection in high-risk infants and children<sup>6,7</sup>.  
71 Throughout the last decades, several vaccine strategies have been developed in order to  
72 prevent disease caused by pneumoviruses, mostly based on recombinant proteins, live-  
73 attenuated vaccines (LAVs)<sup>8,9</sup> or, more recently, mRNA candidates<sup>10-12</sup>. Of note, the LAV  
74 strategies are considered to be well adapted to pediatric immunization and have the advantage  
75 of eliciting both humoral and mucosal immunity by mimicking natural viral replication  
76 routes, in addition to being delivered without adjuvant<sup>13</sup>. This contrasts with formalin-  
77 inactivated pneumovirus-based vaccines, which in the past have been responsible for events  
78 of vaccine-induced enhanced disease<sup>14</sup>. Some pneumovirus-based LAV candidates led to  
79 promising outcomes in *in vitro* and *in vivo* experiments, such as M2-2, NS2, and G/SH gene-  
80 deleted HRSVs, and G/SH-deleted HMPVs<sup>9,15,16</sup>. Unfortunately, final reports on some of  
81 these candidates show them to be over-attenuated and/or ineffective at inducing protective  
82 antibody response in human clinical trials<sup>8,9,17,18</sup>. Only a small number of HMPV LAV  
83 candidates have shown the potential to progress towards clinical evaluation<sup>8,15,19,20</sup>. In this  
84 context, we have previously described an engineered SH gene-deleted recombinant virus  
85 based on the hyperfusogenic A1/C-85473 HMPV strain ( $\Delta$ SH-rC-85473) as a promising LAV

86 candidate (Metavac®): it has shown efficient replication in a human cell-based system, as  
87 well as protective properties in mice lethally challenged with wild type HMPV, including the  
88 induction of neutralizing antibodies, reduced disease severity, weaker inflammatory  
89 responses, and a balanced stimulation of the immune response <sup>20</sup>.

90 On the other hand, development of LAV-based strategies is often hampered by the limited  
91 availability of highly efficient and scalable cell-based production platforms to support the  
92 vaccine need. Currently, viral vaccine production is mostly performed using adherent cells,  
93 such as the Vero and MRC5 cell lines <sup>21-23</sup>. These cell lines are well known and grown in  
94 roller bottles or multiplate cell factory systems <sup>22</sup>. However, costs, space and workforce  
95 constraints prevent these technologies from being easily scalable. In this context, serum-free  
96 suspension cell lines such as the human cell lines PER.C6 (Crucell) <sup>24</sup> and CAP® (CEVEC  
97 Pharmaceutical) <sup>25</sup> or the avian cell lines AGE1.CR® (Probiogen) <sup>26</sup>, EB66® (Valneva) <sup>27</sup>,  
98 and QOR/2E11 cells (Baxter) have been developed to ease cell culture and viral amplification  
99 steps <sup>21</sup>. These cell lines enable reduction of footprint and labor intensiveness, as they are  
100 cultured in bioreactors without microcarriers. During evaluation into whether these have the  
101 potential to become versatile viral production platforms, the AGE1.CR® and EB66® avian  
102 cell lines have been shown to efficiently produce several viruses, such as Modified Vaccinia  
103 Ankara MVA or influenza viruses <sup>22,26-29</sup>. In contrast, none of these new-generation cell lines  
104 has yet been reported to be permissive or to support production of pneumoviruses. Hence,  
105 HRSV is commonly cultured onto anchorage-dependent human Hep-2 cells <sup>30</sup> and HMPV  
106 onto adherent non-human primate LLC-MK2 cells <sup>31</sup>.

107 Considering scalability in the manufacturing process of the *Cairina moschata* duck embryo-  
108 derived DuckCelt®-T17 cell line (Vaxxel), which we previously described as an efficient  
109 platform for production of human and avian influenza viruses <sup>28</sup>, we sought to evaluate its  
110 putative permissiveness and capacity to produce C-85473 HMPV-based viruses, notably our

111 new LAV candidate Metavac®<sup>20</sup>. We characterized the main operational parameters for viral  
112 production, including multiplicity of infection (MOI), cell density, and trypsin input to  
113 achieve optimal production yield. Finally, using *in vitro* and *in vivo* experimental models, we  
114 highlighted the conservation of morphological features, replicative capacities, and  
115 immunizing properties of the Metavac® virus produced in the in-suspension DuckCelt®-T17  
116 cell line.  
117

## 118 **Results**

### 119 **The DuckCelt®-T17 cell line is permissive to C-85473 HMPV and is appropriate for** 120 **viral production**

121 Firstly, we sought to evaluate the permissiveness of DuckCelt®-T17 cells to the prototype  
122 WT C-85473 HMPV and its recombinant GFP-expressing reporter counterpart (rC-85473-  
123 GFP) in routine cell culture parameters, as previously described<sup>28</sup>. As HMPV F protein  
124 cleavage and related virus propagation are known to be trypsin-dependent in adherent cell  
125 culture<sup>32</sup>, we supplemented the culture medium with acetylated trypsin at the final  
126 concentration of 0.5 µg/mL at the time of infection (D0) and two, four and seven days post-  
127 infection (D2, D4, and D7, respectively).

128 Thanks to the follow-up of reporter GFP gene expression in the cells infected by the  
129 recombinant HMPV (rC-85473-GFP), we observed efficient virus propagation in the cellular  
130 suspension over a 10-day period, hence validating the permissiveness of DuckCelt®-T17 cells  
131 to HMPV infection and replication. At a MOI of 0.01, we observed by fluorescent  
132 microscopy maximal GFP expression at 7 days post-infection (7 dpi), as illustrated in **Figure**  
133 **1a**. Viral kinetics of WT C-85473 and rC-85473-GFP viruses were also characterized by  
134 measuring virus production from culture supernatant. We measured mean maximum viral  
135 titers of  $9.8 \times 10^6$  TCID<sub>50</sub>/mL at 6 dpi with the WT C-85473 strain and  $1.9 \times 10^6$  TCID<sub>50</sub>/mL at  
136 8 dpi with the rC-85473-GFP virus (**Figure 1b**). Accordingly, DuckCelt®-T17 cells achieved  
137 a maximal cell density of  $5.5 \times 10^6$  cell/mL at 4 dpi or  $6.6 \times 10^6$  cell/mL at 6 dpi when infected  
138 with WT C-85473 or rC-85473-GFP viruses, respectively (**Figure 1c**). In comparison, mock-  
139 infected cell suspension achieved a maximal cell concentration of  $8.6 \times 10^6$  cell/mL after 8  
140 days of culture (**Figure 1c**). Thus, these results indicate that the DuckCelt®-T17 cell line is  
141 permissive to C-85473 HMPV-based viruses and allows their efficient amplification by 2  
142 log<sub>10</sub> compared to the initial inoculum within an 8-day period.

143

144 **Identification of best operating parameters for viral production of the rC-85473-GFP**  
145 **virus in the DuckCelt®-T17 cell line**

146 Starting from the standard viral culture parameters mentioned above, we aimed to evaluate  
147 separately the influence of the MOI, cell density, time, and concentration of trypsin input on  
148 the HMPV yield in order to identify key operating parameters for the production process in a  
149 10 mL working volume of DuckCelt®-T17 cells.

150 First, DuckCelt®-T17 cells were seeded at  $1 \times 10^6$  cell/mL in supplemented OptiPRO™ SFM  
151 and inoculated the same day with rC-85473-GFP HMPV at three different MOI (0.1, 0.01,  
152 and 0.001). Whereas at a MOI of 0.1, viral production flattened between 6 and 10 dpi with  
153 mean virus titers of  $2.4 \times 10^6$  TCID<sub>50</sub>/mL, mean virus titers were between 2.08 and  $6.58 \times 10^6$   
154 TCID<sub>50</sub>/mL for infection at a MOI of 0.01 at the same time point (**Figure 2a**). In comparison,  
155 when an even lower MOI of 0.001 was used, we measured a maximum virus yield of  
156  $0.78 \times 10^6$  TCID<sub>50</sub>/mL after 10 dpi, significantly lower and later than with a MOI of 0.01 and  
157 0.1 (**Figure 2a**). Moreover, percentage cell infectivity, determined by quantification of GFP-  
158 positive cells by flow cytometry, showed that nearly 100% of DuckCelt®-T17 cells were  
159 infected at 6 dpi at a MOI of 0.1, 8 dpi at a MOI of 0.01, and 10 dpi at a MOI of 0.001  
160 (**Figure 2b**). Hence, despite faster viral replication kinetics in the cellular suspension, the use  
161 of a tenfold higher MOI did not significantly increase virus production compared to MOI  
162 0.01.

163 We then considered the influence of the cell density at the time of virus inoculation.

164 DuckCelt®-T17 cells were centrifuged in order to be seeded at three different cell  
165 concentrations: 0.5, 1, and  $4 \times 10^6$  cells/mL in OptiPRO™ SFM (50% conditioned medium  
166 and 50% fresh medium). Cell suspensions were then inoculated with rC-85473-GFP HMPV  
167 at a MOI of 0.01 and supplemented with acetylated trypsin at 0.5 µg/mL. Maximum virus



168 yields of  $5.26 \times 10^6$  and  $7.32 \times 10^6$  TCID<sub>50</sub>/mL were achieved at 8 dpi when  $0.5$  or  $1 \times 10^6$   
169 cells/mL, respectively, were inoculated (**Figure 2c**). In contrast, significantly lower mean  
170 peak viral titers ( $0.73 \times 10^6$  TCID<sub>50</sub>/mL) were measured at 8 dpi when using an initial cell  
171 concentration of  $4 \times 10^6$  cells/mL (**Figure 2c**), in line with the observed significant reduction  
172 in the maximal percentage of GFP-positive cells. These results show that increasing cell  
173 density above  $1 \times 10^6$  cells/mL at the time of inoculation results in no benefit for HMPV  
174 production (**Figure 2d**).

175 Finally, we looked at the impact of trypsin on virus yield by testing repeated supplementation  
176 or increasing its concentration in the cell culture medium. DuckCelt®-T17 cells were seeded  
177 at  $1 \times 10^6$  cell/mL and then inoculated with rC-85473-GFP HMPV at MOI 0.01. The culture  
178 medium was supplemented or not at varying time points (D0, D0 and D4, or D0, D4, and D7)  
179 with  $0.5 \mu\text{g/mL}$  acetylated trypsin (**Figure 2e-f**). When comparing cell infectivity and virus  
180 titers between experimental conditions, we confirmed that trypsin supplementation is  
181 necessary for viral replication in DuckCelt®-T17 cells, as illustrated by the absence of both  
182 virus amplification and GFP-positive cells in the cell suspension in the absence of trypsin  
183 (**Figure 2e-f**). Efficient and comparable virus propagation was observed after the addition of  
184 trypsin at one, two, or three time points, resulting in nearly 100% of cells being infected at 8  
185 dpi (**Figure 2f**). However, viral production and release in the culture medium seemed to be  
186 impaired when trypsin was only added on D0, as reflected by overall viral yields that were at  
187 least tenfold lower between 8 and 10 dpi in comparison with conditions when trypsin was also  
188 supplemented at D4 (**Figure 2e**). Interestingly, a third addition of trypsin at D7 did not  
189 increase virus production (**Figure 2e**).

190 Based on these results, we further evaluated supplementation of the culture medium with  
191 increasing concentrations of trypsin, notably  $0.5$ ,  $2$  or  $4 \mu\text{g/mL}$  (**Figure 2g-h**). In accordance  
192 with the low percentage of infected cells detected (**Figure 2h**), while the addition of  $4 \mu\text{g/mL}$

193 of acetylated trypsin did not result in virus titers higher than  $1 \times 10^6$  TCID<sub>50</sub>/mL, the addition  
194 of 0.5 or 2  $\mu$ g/mL trypsin led respectively to a 6.5-fold or 4.5-fold higher peak of viral  
195 production at 7 dpi (**Figure 2g**).

196 In conclusion, we identified the best operating parameters to amplify the rC-85473-GFP  
197 HMPV in a 10 mL working volume of DuckCelt®-T17 cells ( $1 \times 10^6$  cells/mL at the time of  
198 inoculation with a MOI of 0.01 and two additions of 0.5  $\mu$ g/mL acetylated trypsin, on D0 and  
199 D4), leading to 2 log<sub>10</sub> higher production yield in comparison to the initial inoculum.

200

### 201 **Production of the Metavac® LAV candidate in the DuckCelt®-T17 cell line using** 202 **optimized operating parameters**

203 We further aimed to determine if the best operating production parameters identified with the  
204 rC-85473-GFP virus in DuckCelt®-T17 cells were well adapted to the production of our  
205 previously described novel LAV candidate Metavac®<sup>20</sup>, which is an engineered SH gene-  
206 deleted version of the C-85473 strain of HMPV. We therefore inoculated  $1 \times 10^6$  DuckCelt®-  
207 T17 cells/mL with Metavac® at MOIs of 0.1, 0.01, or 0.001 in cell culture medium  
208 supplemented with 0.5  $\mu$ g/mL of acetylated trypsin on D0 and D4 post-infection. As shown in  
209 **Figure 3a**, the maximum viral production was achieved at 10 dpi with  $1.02 \times 10^6$  TCID<sub>50</sub>/mL,  
210  $1.94 \times 10^6$  TCID<sub>50</sub>/mL, or  $0.62 \times 10^6$  TCID<sub>50</sub>/mL for a MOI of 0.1, 0.01, or 0.001, respectively.  
211 When we measured the percentage of infected cells, the maximum infectivity was achieved in  
212 6 days at a MOI of 0.1, similar to timings observed with the rC-85473-GFP virus (**Figure 2b**),  
213 whereas 10 days were necessary to infect the whole cell suspension at a MOI of 0.01 (**Figure**  
214 **3b**). Interestingly, a MOI of 0.001 was not sufficient to allow propagation of the Metavac®  
215 virus to more than  $36.2 \pm 37.7\%$  of cells after 10 days of culture.

216 To investigate the scalability of the DuckCelt®-T17 production platform, we then performed  
217 Metavac® production in a 500 mL working volume in shaker flasks, using the selected best

218 operating parameters and a MOI of 0.01. Similar to the results obtained in 10 mL cultures,  
219 peak virus production was  $2.2 \times 10^6$  TCID<sub>50</sub>/mL at 7 dpi (**Figure 3c**), which corresponded with  
220 the maximum percentage of infected GFP-positive cells (**Figure 3d**).

221 Altogether, these results show that the DuckCelt®-T17 cell line is permissive and well  
222 adapted to scalable production of our LAV candidate. However, as Metavac® is an attenuated  
223 virus, the duration of the production process could be longer than with the rC-85473-GFP  
224 strain but is expected to reach comparable production yields.

225

### 226 **HMPV virions produced in the DuckCelt®-T17 cell line conserve their morphological** 227 **characteristics and full replicative properties in LLC-MK2 cells and reconstituted HAE**

228 We further characterized key morphological and functional viral properties of rC-85473-GFP  
229 and Metavac® viruses produced in DuckCelt®-T17 cells. Transmission electron microscopy  
230 analysis of virions released in the culture medium revealed typical HMPV pleiomorphic virus  
231 particles with a mean diameter of 174.4 nm and 183.2 nm for rC-85473-GFP and Metavac®,  
232 respectively, presenting abundant glycoproteins at their surface (**Figure 4a**). Viruses  
233 produced in the DuckCelt®-T17 cell line were then assessed for their replicative properties in  
234 LLC-MK2 cells over a 7-day period (**Figure 4b-d**). In line with previous studies using the  
235 viral hyperfusogenic C-85473 background<sup>33,34</sup>, fluorescence microscopy showed the  
236 formation of large syncytia, clearly visible as early as 4 dpi (**Figure 4b**). Peak viral titers of  
237 approximately  $4.95 \times 10^5$  TCID<sub>50</sub>/mL and  $4.15 \times 10^5$  TCID<sub>50</sub>/mL were reached by 5 dpi for rC-  
238 85473-GFP and Metavac® viruses, respectively (**Figure 4c**). Additionally, crystal violet  
239 coloration of infected LLC-MK2 monolayers revealed very similar kinetics between both  
240 DuckCelt®-T17-produced rC-85473-GFP and Metavac® viruses and those produced in LLC-  
241 MK2 (**Figure 4d**).

242 We then evaluated rC-85473-GFP and Metavac® viruses using the Mucilair™ 3D-  
243 reconstituted HAE *in vitro* physiological model of infection<sup>20,35</sup>. Both viruses were able to  
244 infect and fully spread within the HAE, as shown by their reporter GFP expression pattern at  
245 5 dpi (**Figure 5a** and **5b**). Moreover, we measured the progeny virus secretion at the HAE  
246 apical surface during the time course of infection by quantification of N gene copies (**Figure**  
247 **5c**). In line with previous results<sup>20</sup>, both DuckCelt®-T17-produced viruses demonstrated high  
248 replicative capacity in HAE. Viral amplification occurred mainly between 2 dpi and 5 dpi, but  
249 viral persistence was observed until at least 12 dpi. Maximal apical viral titers of  $1.07 \times 10^9$   
250 and  $1.29 \times 10^9$  N copies per apical sample were reached at 5 dpi for rC-85473-GFP and  
251 Metavac®, respectively (**Figure 5c**).

252 Taken together, our results indicate that rC-85473-derived HMPVs produced in the in-  
253 suspension avian DuckCelt®-T17 cell platform fully conserve their *in vitro* phenotype and  
254 harbor efficient viral replication in both LLC-MK2 and HAE models.

255

### 256 **Metavac® vaccine candidate produced in DuckCelt®-T17 cells conserves full** 257 **immunogenic properties in mice**

258 Considering the potential of the Metavac® virus as a HMPV LAV candidate, we further  
259 evaluated its capacity to infect, replicate in, and immunize BALB/c mice. We therefore  
260 infected BALB/c mice intranasally with  $1 \times 10^6$  TCID<sub>50</sub> of Metavac® either produced in LLC-  
261 MK2 or DuckCelt®-T17 cells. In agreement with previous results<sup>20,36</sup>, neither weight loss  
262 nor clinical signs were observed during the 14-day follow-up in the two Metavac®-infected  
263 groups, compared to the non-infected (mock) group (**Figure 6b**). After 5 and 14 dpi, we  
264 quantified the viral pulmonary replication by RT-qPCR from lung homogenates (**Figure 6a**).  
265 Metavac® viruses produced in either LLC-MK2 or DuckCelt®-T17 cells replicated

266 efficiently in the lungs of infected mice after 5 dpi and were almost cleared by 14 dpi (**Figure**  
267 **6c**), as previously described for LAVs based on a C-85473 strain of HMPV in which the SH  
268 gene is deleted<sup>20,36</sup>.

269 We finally investigated the capacity of Metavac® to induce the production of high levels of  
270 HMPV neutralizing antibodies *in vivo* (**Figure 6d**). BALB/c mice were prime-infected with  
271  $5 \times 10^5$  TCID<sub>50</sub> of rC-85473-GFP and boost-infected 30 days later *via* the intranasal route with  
272  $5 \times 10^5$  TCID<sub>50</sub> of Metavac® viruses either produced in LLC-MK2 or DuckCelt®-T17 cells.  
273 Blood samples were collected prior to prime and boost, as well as 21 days post-boost (**Figure**  
274 **6d**). As expected, we detected low levels of viral genome in the lungs of all groups that  
275 received prime and boost intranasal infections ( $1 \times 10^4$  to  $1 \times 10^5$  of N gene copies per lung, see  
276 **Figure 6e**), in contrast with the group prime-instilled with OptiMEM medium and boost-  
277 infected with rC-85473-GFP (up to  $5 \times 10^8$  of N gene copies per lung, **Figure 6e**).

278 In line with these results, high levels of neutralizing antibodies were titrated 21 days after  
279 boost by both Metavac® viruses, in comparison with control groups that received either prime  
280 or boost rC-85473-GFP infections (**Figure 6f**). Interestingly, three weeks after boost, sera  
281 from both groups could efficiently neutralize homologous rC-85473-GFP HMPVs produced  
282 in DuckCelt®-T17 cells, and the heterologous CAN98-75 strain, whereas no significant  
283 HMPV antibody response was measured 29 days after only the prime infection in all groups  
284 of mice, as expected. In addition, rC-85473-GFP HMPVs produced in LLC-MK2 cells were  
285 similarly neutralized by antibodies induced by both boosts with Metavac® viruses produced  
286 in LLC-MK2 or DuckCelt®-T17 cells (**Supplementary Table 1**).

287 Altogether, our results indicate that the Metavac® vaccine candidate produced in the in-  
288 suspension avian DuckCelt®-T17 cell platform conserves full immunization properties by  
289 inducing efficiently neutralizing antibodies against both homologous and heterologous WT  
290 patient-derived strains in a murine model.

291 **Discussion**

292 Despite the worldwide burden of human pneumoviruses and the effort to develop vaccine  
293 strategies, there is still no approved vaccine against HRSV or HMPV. When considering the  
294 production of LAV candidates, one of the major obstacles is the deficit of scalable cell lines  
295 able to respond to industrial production requirements. In this study, we confirmed that the  
296 DuckCelt®-T17 cell line, which we have already described for its serum-free suspension  
297 cultivation and its ability to efficiently produce influenza viruses<sup>28</sup>, can respond to the need  
298 for a scalable cell line for the manufacture of HMPV, and more specifically of our LAV  
299 candidate Metavac®, derived from the C-85473 strain of HMPV<sup>20</sup>. We demonstrated that the  
300 DuckCelt®-T17 cell line supports Metavac® replication with high yields in upscalable  
301 cultivation conditions, conserving both *in vitro* replication properties (in LLC-MK2 and 3D-  
302 reconstituted HAE models) and the ability to infect and induce a neutralizing antibody  
303 response in a mouse model.

304 Since the first description of HMPV in 2001, a limited number of cell-based production  
305 platforms, such as Vero or LLC-MK2 cells, have been shown to support HMPV replication.  
306 Moreover, in adherent cell lines, pneumoviruses are well known to spread preferentially by  
307 different cell-to-cell mechanisms<sup>37</sup>. Given these considerations, it is of particular interest that  
308 the DuckCelt®-T17 cell platform is susceptible to C-85473 HMPV infection and efficiently  
309 supports its propagation into the cellular suspension, in culture conditions compatible with the  
310 in-suspension properties of the DuckCelt®-T17 cell line. Of note, the virus particles are  
311 directly detected and titrated from the culture medium without requiring mechanical cell lysis  
312 and exhibit the expected morphological features. Moreover, in this study, we have shown that  
313 the vaccine candidate Metavac® produced in DuckCelt®-T17 cells conserved its replicative  
314 properties in experimental *in vitro* models, infecting mammalian LLC-MK2 cells and cells in  
315 the physiological HAE model. In this 3D model mimicking the human nasal mucosa, C-

316 85473-derived HMPVs produced in DuckCelt®-T17 cells can infect and sustain viral  
317 propagation over time, demonstrating the conservation of the properties required to infect  
318 HAE cells. Based on these results, it appears that post-translation modifications and HMPV  
319 virion packaging provided by DuckCelt®-T17 avian cells are compatible with preservation of  
320 function and antigenicity of the HMPV F glycoprotein. Indeed, HMPVs produced in  
321 DuckCelt®-T17 cells show full infectivity in LLC-MK2 cells, a HAE model, and mice; this  
322 indicates the presence of a full functional F protein, which is crucial for viral attachment and  
323 entry into host cells <sup>20</sup>. More importantly, as the HMPV F protein is known to be the major  
324 viral antigen <sup>38</sup>, we validate here that our engineered Metavac® LAV candidate produced in  
325 the DuckCelt®-T17 cell line can induce a neutralizing antibody response against both  
326 homologous and heterologous HMPV strains, in accordance with the already demonstrated  
327 cross-protection potential of metapneumoviruses <sup>20</sup>. Interestingly, murine neutralizing  
328 antibodies induced by HMPVs produced in LLC-MK2 cells also efficiently neutralized rC-  
329 85473-GFP viruses produced in DuckCelt®-T17 cells (Table 1), suggesting that there is a  
330 correct folding of the F protein at the virion surface.

331 From an industrial application perspective, we aimed to identify the best operating parameters  
332 that enable high-yield viral production while lowering costs and/or speed up the product  
333 harvest. We have shown that the MOI used should not be lower than 0.01 and the cell density  
334 should not be higher than  $1 \times 10^6$  cell/mL at the time of inoculation to achieve a maximum  
335 production yield within a time period compatible with cellular growth kinetics. We previously  
336 showed that a metabolic change occurs when the cell density is  $3 \times 10^6$  cells/mL or higher <sup>28</sup>,  
337 which could explain loss of susceptibility to HMPV infection observed in DuckCelt®-T17  
338 cells at higher cell densities. In contrast, infection at a lower cell density ( $0.5 \times 10^6$  cells/mL)  
339 shows similar viral amplification kinetics to those seen with an infection at a cell density of  
340  $1 \times 10^6$  cells/mL, which could be advantageous for upscaling the production process. Given

341 these results, further explorations will be focused on cell metabolism, investigating whether  
342 different feeding strategies or a fed-batch approach could enhance or extend viral  
343 amplification.

344 As infection with C-85473 HMPV is known to be trypsin-dependent in adherent cell models  
345 because of the impact of trypsin on F protein properties <sup>32-34</sup>, a particular effort was made to  
346 identify the optimal trypsin supplementation required to achieve a high yield in DuckCelt®-  
347 T17 cells. As anticipated, the presence of trypsin in the culture medium was critical for virus  
348 infection; HMPVs being basically unable to infect DuckCelt®-T17 cells in the absence of  
349 trypsin. Accordingly, adding trypsin twice during the process was sufficient to initiate and  
350 sustain the viral production, without adverse effects on DuckCelt®-T17 cell viability and cell  
351 growth.

352

353 In conclusion, the DuckCelt®-T17 cell line appears to be a promising platform for the  
354 manufacture of viral vaccines, and more particularly for our LAV candidate Metavac®, which  
355 is efficiently produced while maintaining its full replicative and immunizing properties in a  
356 mouse model. Considering the permissiveness of the DuckCelt®-T17 cell line to several  
357 influenza strains and vaccine seeds and its suitability for cultivation in a variety of suspension  
358 facilities, including single-use bioreactors up to 2 L of working volume <sup>28</sup>, bioproduction  
359 processes based on the DuckCelt®-T17 cell platform would be scalable in order to reach  
360 large-scale virus propagation and cost-effective vaccine production in industrial volumes.

361

362



363 **Methods**

364 **Cells and viruses**

365 The DuckCelt®-T17 cell line (ECACC 0907703) was grown in suspension in OptiPRO™  
366 Serum Free Medium (SFM, Gibco) supplemented with 1% penicillin/streptomycin  
367 (10,000U/ml, Gibco), 2% L-glutamin (Gibco), and 0.2% Pluronic F68 (Gibco), as previously  
368 described<sup>28</sup>. The culture was performed at 37°C in a CO<sub>2</sub> Kühner incubator (ISF1-X, Kühner)  
369 with 5% CO<sub>2</sub> and 85% humidity. Agitation speed depended on the culture scale: 175 rpm for  
370 a working volume of 10 mL in TubeSpin® 50 mL (TPP®); 110 rpm from 20 to 500 mL of a  
371 working volume in Erlenmeyer shaker flasks (Erlenmeyer flask polycarbonate DuoCAP®,  
372 TriForest). Cells were passaged every 3 to 4 days at cell concentrations of  $0.7 \times 10^6$  cell/mL.  
373 LLC-MK2 cells (ATCC CCL-7) were maintained in minimal essential medium (MEM, Life  
374 Technologies) supplemented with 10% fetal bovine serum (Wisent) and 1%  
375 penicillin/streptomycin (10,000U/ml).  
376 The wild-type (WT) A1/C-85473 strain of HMPV (GenBank accession number:  
377 KM408076.1) and two A1/C-85473-derived recombinant viruses were used in this study. The  
378 recombinant rC-85473-GFP (green fluorescent protein) virus, which is a GFP-expressing C-  
379 85473 WT counterpart virus, and the  $\Delta$ SH-rC-85473-GFP virus (Metavac®), a recombinant  
380 virus from which the viral SH gene sequence is deleted, were generated by reverse genetics,  
381 as previously described<sup>20,33</sup>. In order to constitute initial working viral stocks, both of these  
382 viruses were amplified onto LLC-MK2 monolayers in OptiMEM (Gibco) in the presence of  
383 1% penicillin/streptomycin and acetylated trypsin (T6763, Sigma) and concentrated by  
384 ultracentrifugation, as previously described<sup>20,33</sup>. Viral stocks were titrated onto LLC-MK2  
385 cells at 50% tissue culture infectious doses (TCID<sub>50</sub>)/mL according to the Reed and Muench  
386 method<sup>39</sup>.

## 387 **Infection and HMPV production in DuckCelt®-T17 cells**

388 DuckCelt®-T17 cells in a working volume of 10mL in TubeSpin® 50 mL or 500 mL in 1 L  
389 Erlenmeyer shaker flasks were inoculated with HMPV in OptiPRO™ SFM (Gibco)  
390 supplemented with 1% penicillin/streptomycin (Gibco), 2% L-glutamin (Gibco), 0.2%  
391 Pluronic F68 (Gibco), and acetylated trypsin (T6763, Sigma). The viral production was  
392 monitored over a 10-day culture period by cell numeration, viability estimation, fluorescent  
393 microscopy (EVOS™ M5000 Cell Imaging System, Invitrogen), infectious TCID<sub>50</sub> titer  
394 measurement<sup>39</sup>, and infectivity quantification by flow cytometry<sup>20</sup>. Briefly, 10 µl of the  
395 suspension was diluted in trypan blue and analyzed using a Countess™ II FL Automated Cell  
396 Counter. We then harvested and centrifuged a minimal sample of 1x10<sup>6</sup> cells in suspension,  
397 supernatants were titrated as TCID<sub>50</sub>/mL and pelleted cells were fixed in a 2% formaldehyde  
398 solution to be analyzed by flow cytometry (FACS CantoII analyzer, Becton Dickinson). The  
399 percentages of infected GFP-positive cells in a minimum of 1x10<sup>4</sup> total cells were measured  
400 with FACS Diva software.

401 To constitute concentrated DuckCelt®-T17-produced viral working stocks, the whole  
402 suspension of cells was harvested after 7–8 days of production, clarified by centrifugation at  
403 2000 rpm, and then the supernatant was concentrated by ultracentrifugation as previously  
404 described<sup>20,33</sup>. The pellet obtained was resuspended in OptiMEM and stored at -80°C for  
405 further use.

## 406 **Transmission electron microscopy**

407 DuckCelt®-T17-produced HMPVs were harvested and concentrated by ultracentrifugation as  
408 previously described. Viral particles were then resuspended in NaCl (0.9%) and filtered at  
409 0.45 µm. Suspensions were adsorbed on 200-mesh nickel grids coated with formvar-C for 10

410 min at room temperature. Then, grids with suspensions were colored with Uranylless (Delta  
411 Microscopies) for 1 min and observed on a transmission electron microscope (Jeol 1400 JEM,  
412 Tokyo, Japan) equipped with a Gatan camera (Orius 1000) and Digital Micrograph Software.

### 413 ***In vitro* replicative assay**

414 Confluent monolayers of LLC-MK2 cells in 24-well plates were infected with rC-85473-GFP  
415 or Metavac® HMPVs produced in DuckCelt®-T17 cells in suspension or in adherent LLC-  
416 MK2 cells at a MOI of 0.01, as described previously<sup>33</sup>. Supernatants of infected wells were  
417 harvested in triplicate every 24 h for seven days and endpoint TCID<sub>50</sub>/mL titrations were  
418 performed on each sample. After harvest, infected cell monolayers were fixed in 2%  
419 formaldehyde and colored with crystal violet solution.

420

### 421 **Infection of reconstituted human airway epithelium**

422 *In vitro* 3D-reconstituted human airway epithelium (HAE), derived from primary nasal cells  
423 from healthy donors (MucilAir™), was purchased from Epithelix (Switzerland). Viral  
424 inoculum corresponding to a MOI of 0.1 was added onto ciliated cells and incubated for 2 h at  
425 37°C and 5% CO<sub>2</sub>. Infections were monitored for the 12 days after viral inoculation (days  
426 post-infection, dpi); images of infected epithelium were captured by fluorescent microscopy  
427 at 5 dpi and apical washes with warm OptiMEM were performed at 2, 5, and 12 dpi in order  
428 to extract viral RNA (QIAamp® Viral RNA kit, Qiagen).

429

### 430 **Real Time-quantitative Polymerase Chain Reaction (RT-qPCR)**

431 Amplification of the HMPV N gene from viral RNA samples was performed by quantitative  
432 RT-PCR using the One-Step SYBR™ GreenER™ EXPRESS kit (Invitrogen) and primers: N-  
433 Forward 5'-AGAGTCTCAATACACAATAAAAAGAGATGTAGG-3' and N-Reverse 5'-

434 CCTATCTCTGCAGCATATTTGTAATCAG-3', as previously described<sup>20</sup>. The calibration  
435 of HMPV N copies was assessed by amplification of a plasmid kindly provided by Dr Ab  
436 Osterhaus (Erasmus Medical Center, Rotterdam).

437

#### 438 **Animal studies**

439 Four- to six-week-old female BALB/c mice (Charles River Laboratories) were housed  
440 randomly in groups of five per microisolator cage. Twenty mice were infected by intranasal  
441 instillation with  $1 \times 10^6$  TCID<sub>50</sub> of Metavac® viruses produced in LLC-MK2 adherent cells  
442 (Metavac® LLC) or in in-suspension DuckCelt®-T17 cells (Metavac® T17). As a control  
443 group, mice were mock-infected intranasally with OptiMEM. Animals (n=10) were  
444 monitored on a daily basis over 14 days for weight loss or presence of clinical signs. Mice  
445 were euthanized at 5 (n=4) or 14 dpi (n=6) using sodium pentobarbital and lungs were  
446 removed for the evaluation of viral titers. For virus titration, lungs were homogenized in 1 mL  
447 of phosphate-buffered saline (PBS) before N gene quantification by RT-qPCR.

448 To evaluate the induction of a neutralizing antibody response, mice were prime-infected  
449 intranasally with  $5 \times 10^5$  TCID<sub>50</sub> of the rC-85473-GFP virus. Thirty days after prime infection,  
450 mice were boost-infected intranasally with  $5 \times 10^5$  TCID<sub>50</sub> of Metavac® LLC or Metavac®  
451 T17 (n=10 per group). As control groups of immunization, a group of mice was prime-  
452 instilled with OptiMEM and boost-infected with  $5 \times 10^5$  TCID<sub>50</sub> of rC-85473-GFP, and  
453 another group was prime-infected with  $5 \times 10^5$  TCID<sub>50</sub> of rC-85473-GFP and boost-instilled  
454 with OptiMEM. Animals were monitored on a daily basis, and three mice were euthanized on  
455 day 5 after boost infection for the evaluation of viral titers in lung homogenates by RT-qPCR.  
456 To evaluate the production of neutralizing antibodies, blood samples were harvested by  
457 submandibular puncture prior to prime and boost infections (samples from five mice were  
458 pooled) and by intracardiac puncture 21 days after boost infection (n=6). Serial twofold

459 dilutions of sera were then tested for neutralization of homologous rC-85473-GFP viruses  
460 produced in DuckCelt®-T17 cells (or in LLC-MK2 adherent cells, supplementary data) or  
461 neutralization of the heterologous WT CAN98-75 strain. Reciprocal neutralizing antibody  
462 titers were determined by an endpoint dilution assay, as previously described <sup>14</sup>.

463 Animal studies were approved by the SFR Biosciences Ethics Committee (CECCAPP C015  
464 Rhône-Alpes) under protocol number ENS\_2017\_019 and in accordance with the European  
465 ethical guidelines 2010/63/UE on animal experimentation.

466

#### 467 **Statistical analysis**

468 All statistical tests were conducted using GraphPad Prism5, comparing results expressed as  
469 the mean  $\pm$  SD for each condition, using two-way ANOVAs with Bonferroni post-tests or  
470 one-way ANOVAs with Dunnett's post-test.

471

#### 472 **Data availability**

473 All data generated or analysed during this study are included in this published article (and its  
474 supplementary information files).

475 **Supplementary materials**

476 Supplementary Table 1: Induction of neutralizing antibodies against rC-85473-GFP

477 (produced in LLC-MK2 cell line) by Metavac® viruses in mice

478

479 **Acknowledgments**

480 We thank the microscopy service of the Centre d’Imagerie Quantitative Lyon-Est (CIQLE) in

481 Lyon, the flow cytometry service of Plateforme de Cytométrie en flux at the Centre de

482 Recherche en Cancérologie de Lyon (CRCL), and the animal care services of the Plateau de

483 Biologie Expérimentale de la Souris in Lyon. We thank Fortune Bidossessi for her technical

484 contribution to *in vivo* experiments (INRAE, UVSQ, VIM, 78350 Jouy-en-Josas, France) and

485 Fanny Salasc for her technical contribution to cell culture and viral production (CIRI, Team

486 VirPath U1111, Lyon, France).

487

488 **Author contributions**

489 Conceptualization, J.D., G.B. and M.R.-C.; methodology, J.D., C.C., A.P. and M.R.-C.;

490 validation, J.D., C.C. and A.P.; formal analysis, J.D., C.C. and A.P.; investigation, J.D., C.C.,

491 A.P., D.O.-M., A.T., P.B., B.P., E. L., C.M., V.D., T.J. and M.G.; resources, M.R.-C.;

492 writing—original draft preparation, J.D., C.C. and M.R.-C.; writing—review and editing,

493 A.P., O.T., J.F.-E., K.M., M.-È.H., M.R.-C. and G.B.; visualization, J.D., C.C.; supervision,

494 B.L., G.B. and M.R.-C.; project administration, J.D. and M.R.-C; funding acquisition, G.B.

495 and M.R.-C.

496

497 **Competing interests**

498 The authors declare the following patent applications : patent FR1856801, pending patent

499 concerning the characterization of the new HMPV-derived LAV METAVAC®, applicants :

500 Université Laval, Centre National de la Recherche Scientifique CNRS, Université Claude  
501 Bernard Lyon 1 UCBL, Institut National de la Santé et de la Recherche Médicale INSERM,  
502 École Normale Supérieure de Lyon, inventors : Manuel Rosa-Calatrava, Guy Boivin, Julia  
503 Dubois, Mario Andres Pizzorno, Olivier Terrier, Marie-Eve Hamelin; patent FR1872957,  
504 pending patent concerning the use of the DuckCelt®-T17 cell line for METAVAC®  
505 production, applicants : Université Laval, Centre National de la Recherche Scientifique  
506 CNRS, Université Claude Bernard Lyon 1 UCBL, Institut National de la Santé et de la  
507 Recherche Médicale INSERM, École Normale Supérieure de Lyon, inventors : Manuel Rosa-  
508 Calatrava, Guy Boivin, Julia Dubois, Mario Andres Pizzorno, Olivier Terrier, Aurélien  
509 Traversier.  
510 Manuel Rosa-Calatrava, Guy Boivin, Julia Dubois and Marie-Eve Hamelin are co-founders of  
511 Vaxxel SAS. Julia Dubois and Caroline Chupin are currently employees of Vaxxel SAS.  
512 The funders of the study had no role in the design of the study; in the collection, analyses, or  
513 interpretation of data; in the writing of the manuscript, or in the decision to publish the results.

514

## 515 **Funding**

516 This study was supported by a grant from Agence National de la Recherche (ANR AAP19  
517 METAVAC-T17) to Manuel Rosa-Calatrava and a grant from Canadian Institutes of Health  
518 Research (No. 273261) to Guy Boivin and Université Claude Bernard Lyon 1, Lyon, France.  
519 Andres Pizzorno received the support of the Région Auvergne-Rhône-Alpes (grant CMIRA  
520 Accueil Pro). Julia Dubois received the support of the Région Auvergne-Rhône-Alpes (grant  
521 CMIRA ExploRA'DOC) and of the Consulat Général de France à Québec (Programme  
522 Frontenac). Caroline Chupin received the support of the Association Nationale Recherche  
523 Technologie (ANRT).

524

## 525 References

- 526 1 van den Hoogen, B. G. *et al.* Antigenic and genetic variability of human metapneumoviruses.  
527 *Emerging infectious diseases* **10**, 658-666, doi:10.3201/eid1004.030393 (2004).
- 528 2 Feuillet, F., Lina, B., Rosa-Calatrava, M. & Boivin, G. Ten years of human metapneumovirus  
529 research. *Journal of clinical virology : the official publication of the Pan American Society for*  
530 *Clinical Virology* **53**, 97-105, doi:10.1016/j.jcv.2011.10.002 (2012).
- 531 3 ICTV, I. C. o. T. o. V. (2015).
- 532 4 Papenburg, J. & Boivin, G. The distinguishing features of human metapneumovirus and  
533 respiratory syncytial virus. *Reviews in medical virology* **20**, 245-260, doi:10.1002/rmv.651  
534 (2010).
- 535 5 Shi, T. *et al.* Global, regional, and national disease burden estimates of acute lower respiratory  
536 infections due to respiratory syncytial virus in young children in 2015: a systematic review and  
537 modelling study. *Lancet* **390**, 946-958, doi:10.1016/S0140-6736(17)30938-8 (2017).
- 538 6 Feltes, T. F. *et al.* Palivizumab prophylaxis reduces hospitalization due to respiratory syncytial  
539 virus in young children with hemodynamically significant congenital heart disease. *The Journal*  
540 *of pediatrics* **143**, 532-540, doi:10.1067/s0022-3476(03)00454-2 (2003).
- 541 7 Rocca, A. *et al.* Passive Immunoprophylaxis against Respiratory Syncytial Virus in Children:  
542 Where Are We Now? *International journal of molecular sciences* **22**,  
543 doi:10.3390/ijms22073703 (2021).
- 544 8 Marquez-Escobar, V. A. Current developments and prospects on human metapneumovirus  
545 vaccines. *Expert review of vaccines* **16**, 419-431, doi:10.1080/14760584.2017.1283223 (2017).
- 546 9 Mazur, N. I. *et al.* The respiratory syncytial virus vaccine landscape: lessons from the graveyard  
547 and promising candidates. *The Lancet. Infectious diseases* **18**, e295-e311, doi:10.1016/S1473-  
548 3099(18)30292-5 (2018).
- 549 10 Aliprantis, A. O. *et al.* A phase 1, randomized, placebo-controlled study to evaluate the safety  
550 and immunogenicity of an mRNA-based RSV prefusion F protein vaccine in healthy younger  
551 and older adults. *Human vaccines & immunotherapeutics* **17**, 1248-1261,  
552 doi:10.1080/21645515.2020.1829899 (2021).
- 553 11 Espeseth, A. S. *et al.* Modified mRNA/lipid nanoparticle-based vaccines expressing respiratory  
554 syncytial virus F protein variants are immunogenic and protective in rodent models of RSV  
555 infection. *NPJ vaccines* **5**, 16, doi:10.1038/s41541-020-0163-z (2020).
- 556 12 Bloom, K., van den Berg, F. & Arbutnot, P. Self-amplifying RNA vaccines for infectious  
557 diseases. *Gene therapy* **28**, 117-129, doi:10.1038/s41434-020-00204-y (2021).
- 558 13 Karron, R. A., Buchholz, U. J. & Collins, P. L. Live-attenuated respiratory syncytial virus  
559 vaccines. *Current topics in microbiology and immunology* **372**, 259-284, doi:10.1007/978-3-  
560 642-38919-1\_13 (2013).
- 561 14 Hamelin, M. E., Couture, C., Sackett, M. K. & Boivin, G. Enhanced lung disease and Th2  
562 response following human metapneumovirus infection in mice immunized with the inactivated  
563 virus. *J Gen Virol* **88**, 3391-3400, doi:10.1099/vir.0.83250-0 (2007).
- 564 15 Biacchesi, S. *et al.* Infection of nonhuman primates with recombinant human metapneumovirus  
565 lacking the SH, G, or M2-2 protein categorizes each as a nonessential accessory protein and  
566 identifies vaccine candidates. *Journal of virology* **79**, 12608-12613,  
567 doi:10.1128/JVI.79.19.12608-12613.2005 (2005).
- 568 16 Biacchesi, S. *et al.* Recombinant human Metapneumovirus lacking the small hydrophobic SH  
569 and/or attachment G glycoprotein: deletion of G yields a promising vaccine candidate. *Journal*  
570 *of virology* **78**, 12877-12887, doi:10.1128/JVI.78.23.12877-12887.2004 (2004).
- 571 17 Verdijk, P. *et al.* First-in-human administration of a live-attenuated RSV vaccine lacking the G-  
572 protein assessing safety, tolerability, shedding and immunogenicity: a randomized controlled  
573 trial. *Vaccine* **38**, 6088-6095, doi:10.1016/j.vaccine.2020.07.029 (2020).
- 574 18 Cunningham, C. K. *et al.* Live-Attenuated Respiratory Syncytial Virus Vaccine With Deletion  
575 of RNA Synthesis Regulatory Protein M2-2 and Cold Passage Mutations Is Overattenuated.  
576 *Open forum infectious diseases* **6**, ofz212, doi:10.1093/ofid/ofz212 (2019).



- 577 19 Karron, R. A., San Mateo, J., Wanionek, K., Collins, P. L. & Buchholz, U. J. Evaluation of a  
578 Live Attenuated Human Metapneumovirus Vaccine in Adults and Children. *Journal of the*  
579 *Pediatric Infectious Diseases Society*, doi:10.1093/jpids/pix006 (2017).
- 580 20 Dubois, J. *et al.* Strain-Dependent Impact of G and SH Deletions Provide New Insights for Live-  
581 Attenuated HMPV Vaccine Development. *Vaccines* **7**, doi:10.3390/vaccines7040164 (2019).
- 582 21 Genzel, Y. Designing cell lines for viral vaccine production: Where do we stand? *Biotechnology*  
583 *journal* **10**, 728-740, doi:10.1002/biot.201400388 (2015).
- 584 22 Aubrit, F. *et al.* Cell substrates for the production of viral vaccines. *Vaccine* **33**, 5905-5912,  
585 doi:10.1016/j.vaccine.2015.06.110 (2015).
- 586 23 Rodrigues, A. F., Soares, H. R., Guerreiro, M. R., Alves, P. M. & Coroadinha, A. S. Viral  
587 vaccines and their manufacturing cell substrates: New trends and designs in modern  
588 vaccinology. *Biotechnology journal* **10**, 1329-1344, doi:10.1002/biot.201400387 (2015).
- 589 24 Pau, M. G. *et al.* The human cell line PER.C6 provides a new manufacturing system for the  
590 production of influenza vaccines. *Vaccine* **19**, 2716-2721, doi:10.1016/s0264-410x(00)00508-  
591 9 (2001).
- 592 25 Genzel, Y. *et al.* CAP, a new human suspension cell line for influenza virus production. *Applied*  
593 *microbiology and biotechnology* **97**, 111-122, doi:10.1007/s00253-012-4238-2 (2013).
- 594 26 Lohr, V. *et al.* New avian suspension cell lines provide production of influenza virus and MVA  
595 in serum-free media: studies on growth, metabolism and virus propagation. *Vaccine* **27**, 4975-  
596 4982, doi:10.1016/j.vaccine.2009.05.083 (2009).
- 597 27 Brown, S. W. & Mehtali, M. The Avian EB66(R) Cell Line, Application to Vaccines, and  
598 Therapeutic Protein Production. *PDA journal of pharmaceutical science and technology* **64**,  
599 419-425 (2010).
- 600 28 Petiot, E. *et al.* Influenza viruses production: Evaluation of a novel avian cell line DuckCelt(R)-  
601 T17. *Vaccine* **36**, 3101-3111, doi:10.1016/j.vaccine.2017.03.102 (2018).
- 602 29 Leon, A. *et al.* The EB66(R) cell line as a valuable cell substrate for MVA-based vaccines  
603 production. *Vaccine* **34**, 5878-5885, doi:10.1016/j.vaccine.2016.10.043 (2016).
- 604 30 Noor, A. & Krilov, L. R. Respiratory syncytial virus vaccine: where are we now and what comes  
605 next? *Expert opinion on biological therapy* **18**, 1247-1256,  
606 doi:10.1080/14712598.2018.1544239 (2018).
- 607 31 Shafagati, N. & Williams, J. Human metapneumovirus - what we know now. *F1000Research*  
608 **7**, 135, doi:10.12688/f1000research.12625.1 (2018).
- 609 32 Schowalter, R. M., Smith, S. E. & Dutch, R. E. Characterization of human metapneumovirus F  
610 protein-promoted membrane fusion: critical roles for proteolytic processing and low pH.  
611 *Journal of virology* **80**, 10931-10941, doi:10.1128/JVI.01287-06 (2006).
- 612 33 Aerts, L. *et al.* Effect of in vitro syncytium formation on the severity of human  
613 metapneumovirus disease in a murine model. *PLoS One* **10**, e0120283,  
614 doi:10.1371/journal.pone.0120283 (2015).
- 615 34 Dubois, J. *et al.* Mutations in the fusion protein heptad repeat domains of human  
616 metapneumovirus impact on the formation of syncytia. *J Gen Virol* **98**, 1174-1180,  
617 doi:10.1099/jgv.0.000796 (2017).
- 618 35 Nicolas de Lamballerie, C. *et al.* Characterization of cellular transcriptomic signatures induced  
619 by different respiratory viruses in human reconstituted airway epithelia. *Scientific reports* **9**,  
620 11493, doi:10.1038/s41598-019-48013-7 (2019).
- 621 36 Le, V. B. *et al.* Human metapneumovirus activates NOD-like receptor protein 3 inflammasome  
622 via its small hydrophobic protein which plays a detrimental role during infection in mice. *PLoS*  
623 *pathogens* **15**, e1007689, doi:10.1371/journal.ppat.1007689 (2019).
- 624 37 Cifuentes-Munoz, N., Dutch, R. E. & Cattaneo, R. Direct cell-to-cell transmission of respiratory  
625 viruses: The fast lanes. *PLoS pathogens* **14**, e1007015, doi:10.1371/journal.ppat.1007015  
626 (2018).
- 627 38 Skiadopoulos, M. H. *et al.* Individual contributions of the human metapneumovirus F, G, and  
628 SH surface glycoproteins to the induction of neutralizing antibodies and protective immunity.  
629 *Virology* **345**, 492-501, doi:10.1016/j.virol.2005.10.016 (2006).

630 39 Hamelin, M. E. *et al.* Pathogenesis of human metapneumovirus lung infection in BALB/c mice  
631 and cotton rats. *Journal of virology* **79**, 8894-8903, doi:10.1128/JVI.79.14.8894-8903.2005  
632 (2005).

633

634

635 **Figures**

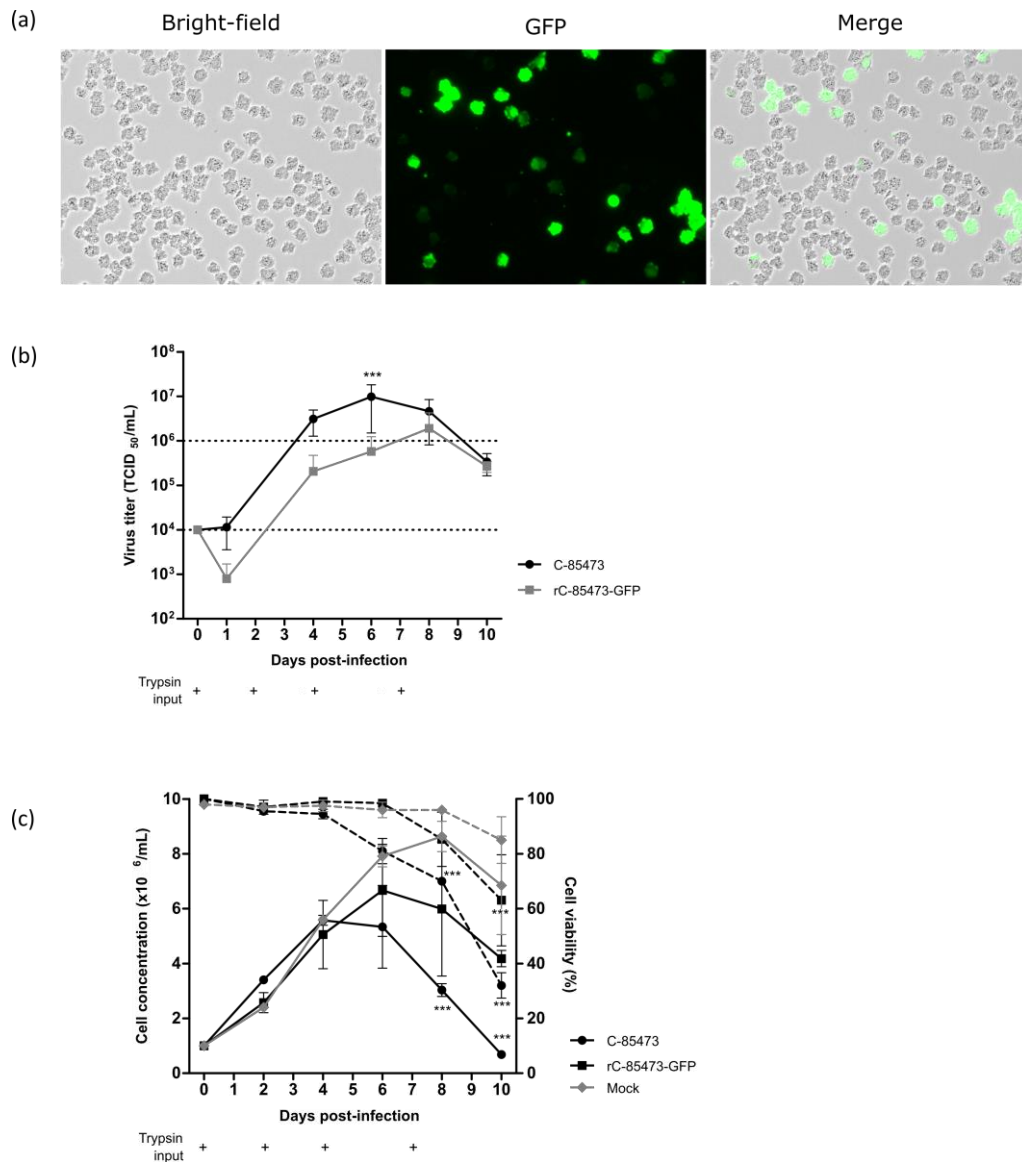

**Figure 1 - Viral kinetics of the wild-type C-85473 HMPV and recombinant rC-85473-GFP HPMV in the DuckCelt®-T17 cell line.** Cells were seeded at  $1 \times 10^6$  cell/mL in a 10mL working volume and infected at a MOI of 0.01. Trypsin was added at 0.5  $\mu$ g/mL on Day (D) 0, D2, D4, and D7 (+). (a) Picture of T17 cells infected with rC-85473-GFP at 7 dpi (days post-infection). Each picture was taken in bright field and fluorescent microscopy (x20 magnification). (b) Viral titers were measured from culture medium as 50% tissue culture infectious doses (TCID<sub>50</sub>)/mL in LLC-MK2 cells. (c) Cell growth (solid line) and viability percentage (dotted line) were measured with the Countess™ II FL Automated Cell Counter. Results are shown as means  $\pm$  SD and represent duplicates in two independent experiments. \*\*\*  $p < 0.001$  when comparing the infected conditions to each other (b) or to the mock condition (c) using a two-way repeated measures ANOVA.

636

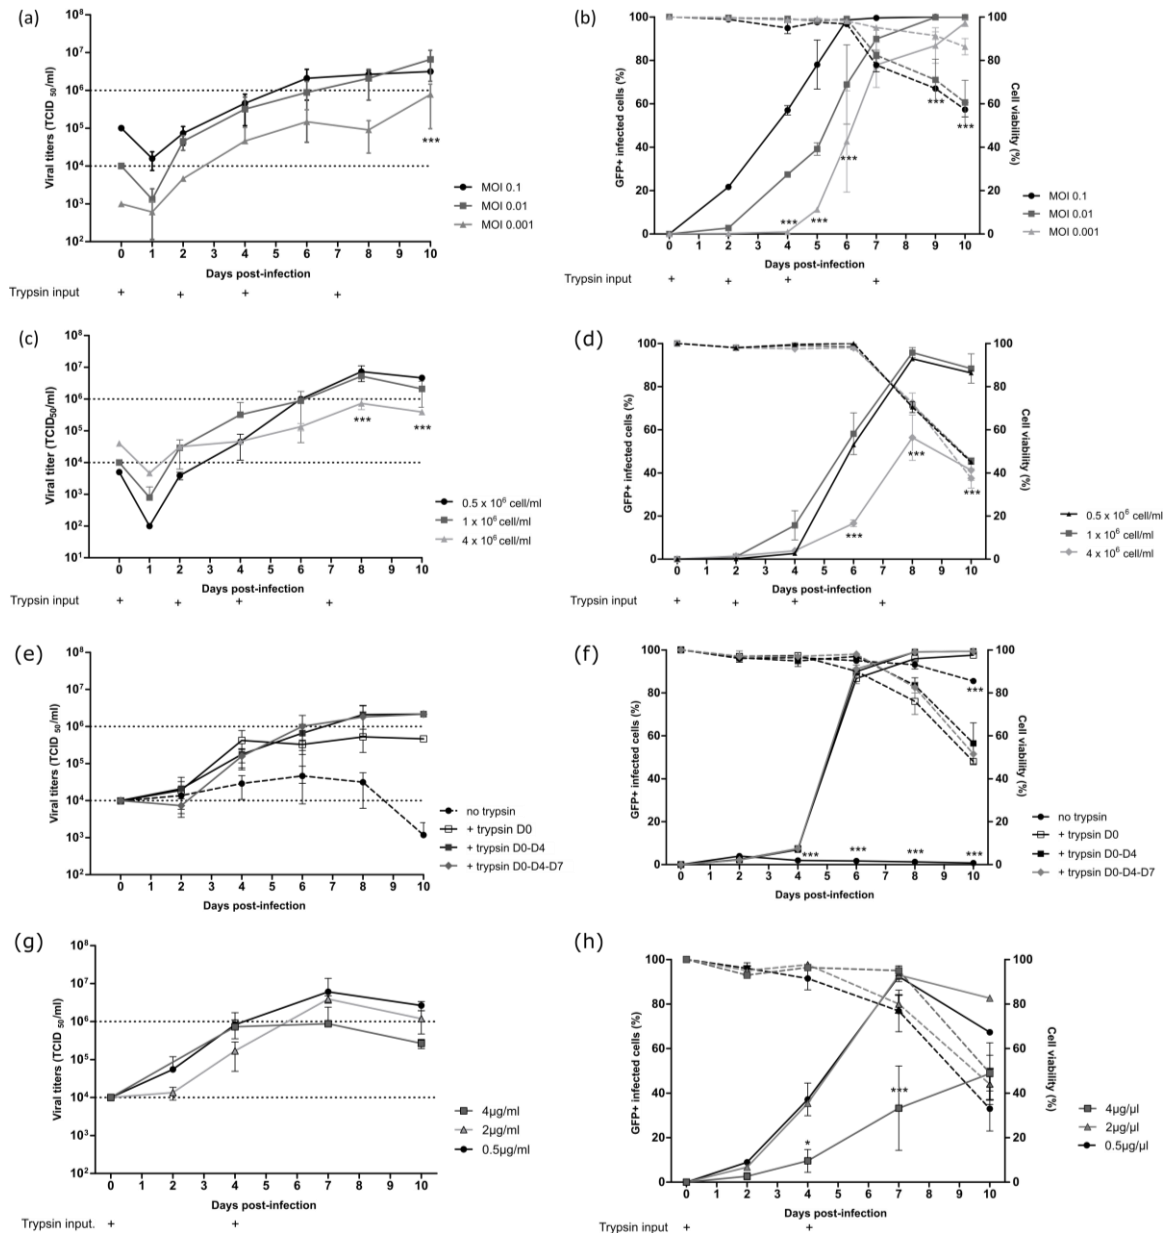

**Figure 2 - Evaluation of multiplicity of infection (MOI), cell density, trypsin concentration, and optimal timing for trypsin addition on rC-85473-GFP HMPV production kinetics in the DuckCelt®-T17 cell line.** Culture parameters in a 10 mL working volume were evaluated separately by viral titration (a–c–e–g) and cell viability and infectivity measurement (b–d–f–h; dotted line for viability and solid line for infectivity). Viral titers were measured from culture medium as TCID<sub>50</sub>/mL in LLC-MK2 cells. Viability was measured with trypan blue using an automated cell counter. Infected GFP-positive cells were evaluated with the FACS CantoII. (a–b) Evaluation of a MOI of 0.1, 0.01 or 0.001. (c–d) Evaluation of three different cell densities at the time of infection: 0.5, 1, or 4×10<sup>6</sup> cell/mL (e–f) Evaluation of timing of trypsin addition. Trypsin was added at 0.5 μg/mL at D0, at D0 and D4, or at D0, D4, and D7, or no trypsin was added. (g–h) Evaluation of trypsin concentration: 0.5, 2, or 4 μg/mL. Results are shown as means ± SD and represent duplicates in two independent experiments. \* p < 0.05, \*\* p < 0.01, \*\*\* p < 0.001 when comparing infected conditions to each other using a two-way repeated measures ANOVA.

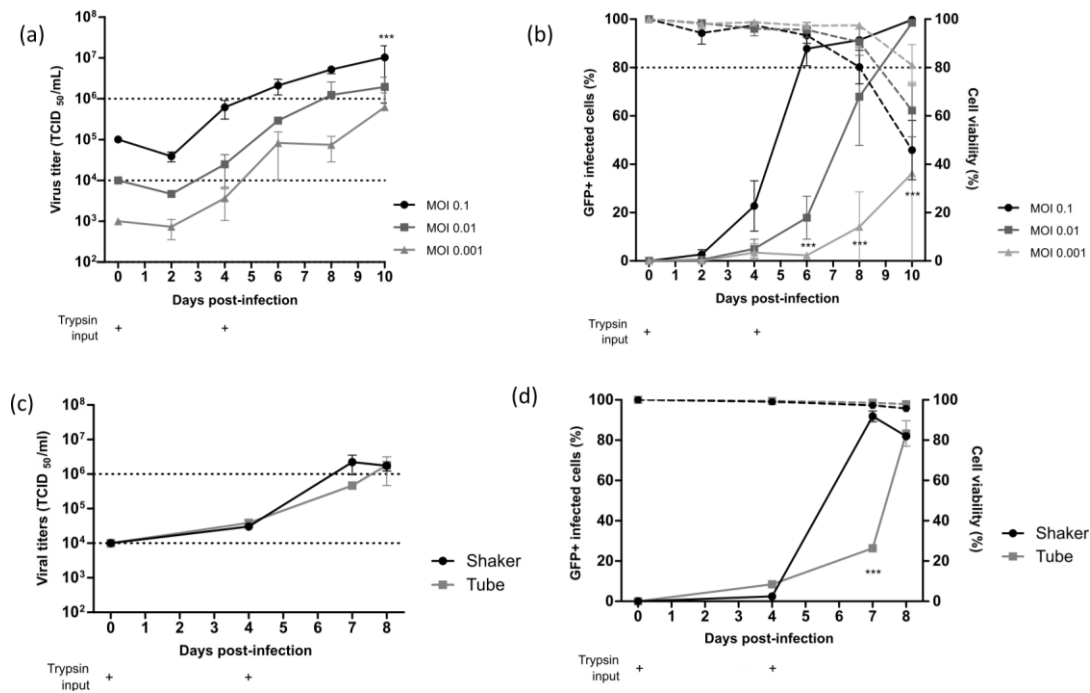

**Figure 3 – Viral kinetics of live-attenuated vaccine candidate ΔSH-rC-85473-GFP HMPV in the DuckCelt®-T17 cell line.** Based on optimal production parameters identified, cells were seeded at  $1 \times 10^6$  cell/mL, infected, and trypsin was added at  $0.5 \mu\text{g/mL}$  on D0 and D4 (+). Culture parameters in a 10 mL working volume were evaluated separately by viral titration (a–c) and viability and infectivity measurement (b–d; dotted line for cell viability and solid line for infectivity). (a–b) Evaluation of viral kinetics and cell infectivity for a MOI of 0.1, 0.01, or 0.001 in a 10 mL working volume. (c–d) Evaluation of viral kinetics and cell infectivity when cells were seeded in a 500 mL (shaker) or 10 mL (tube) working volume and infected at a MOI of 0.01. Results are shown as means  $\pm$  SD and represent duplicates in two independent experiments. \*\*\*  $p < 0.001$  when comparing infected conditions to each other using a two-way repeated measures ANOVA.

638  
639

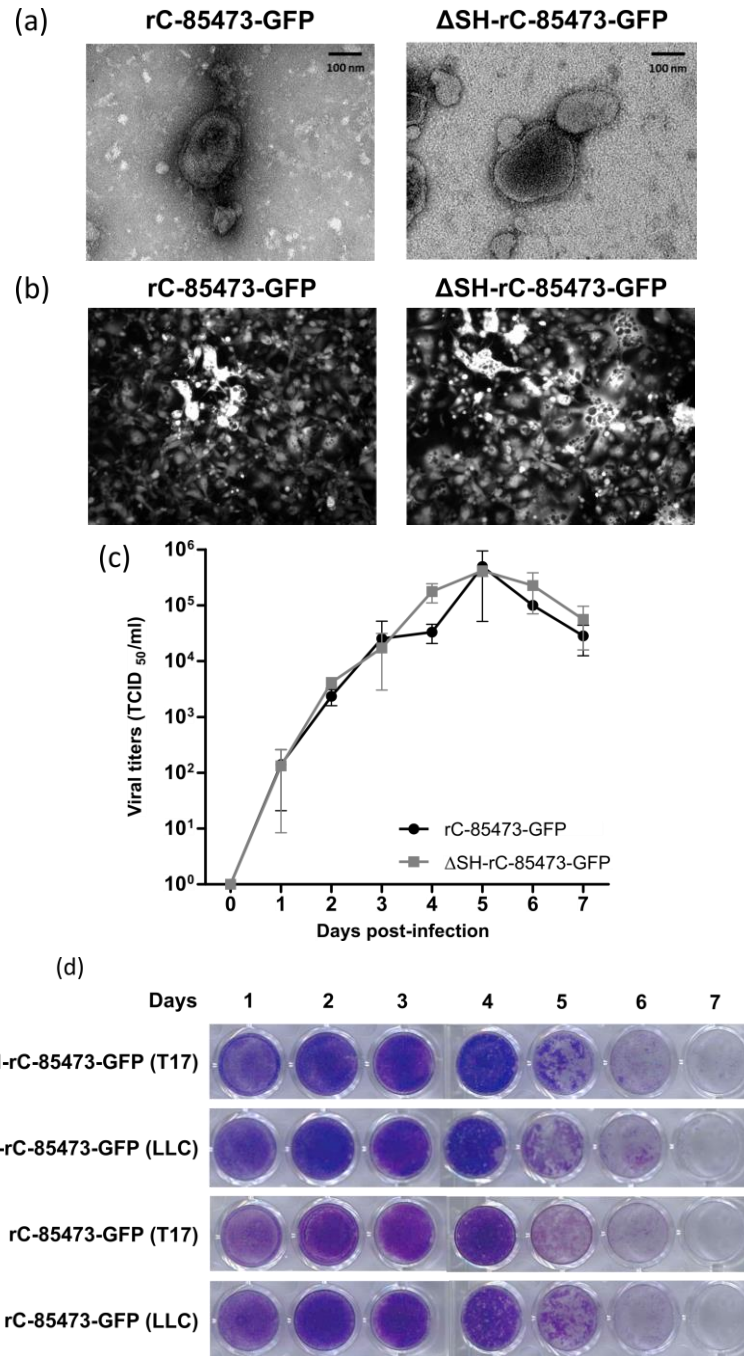

**Figure 4: Visualization of T17-produced rC-85473-GFP and  $\Delta$ SH-rC-85473-GFP rHMPV virus particles and evaluation of *in vitro* replicative capacity.** (a) Representative negative stain electron microscopy images of rC-85473-GFP and  $\Delta$ SH-rC-85473-GFP virions, obtained from DuckCelt®-T17 culture, are presented. Bar represents 100 nm. (b-d) LLC-MK2 monolayers in 24-well plates were infected with each of the recombinant HMPVs at a MOI of 0.01. (b) Images of representative cytopathic effects of each virus were captured after 4 dpi by fluorescent microscopy (x10 magnification). (c) Supernatants were harvested every 24 h for 7 days, frozen and subsequently thawed and titrated as TCID<sub>50</sub>/mL onto LLC-MK2 cells. Growth curves represent mean titers  $\pm$  SD of each time point titrated in triplicate. (d) Infected LLC-MK2 monolayers were fixed in formaldehyde after harvest and images were captured after crystal violet coloration.

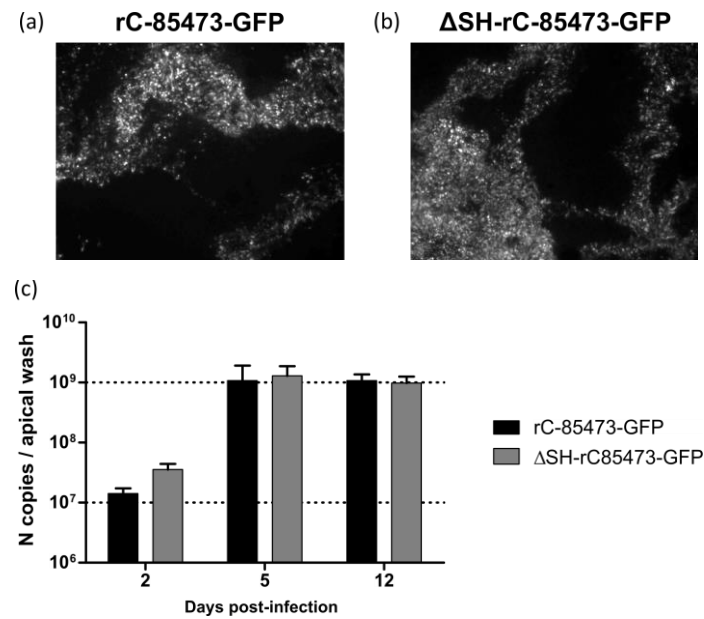

**Figure 5: Recombinant HMPVs produced in the DuckCelt®-T17 cell line conserved infectivity and replicative capacity in 3D-reconstituted human airway epithelium (HAE).** MucilAir™ epithelium from healthy donors were infected with rC-85473-GFP or ΔSH-C-85473-GFP viruses produced in DuckCelt®-T17 cells at a MOI of 0.1 and monitored for 12 days. Viral spread of rC-85473-GFP T17 (a) or ΔSH-C-85473-GFP T17 (b) in HAE at 5 dpi was observed by fluorescence microscopy (10x magnification). Viral quantification from epithelium apical washes (c) at 2, 5, and 12 dpi was performed by specific RT-qPCR of the N viral gene. Data are shown as means ± SD and represent experimental duplicates.

641  
642

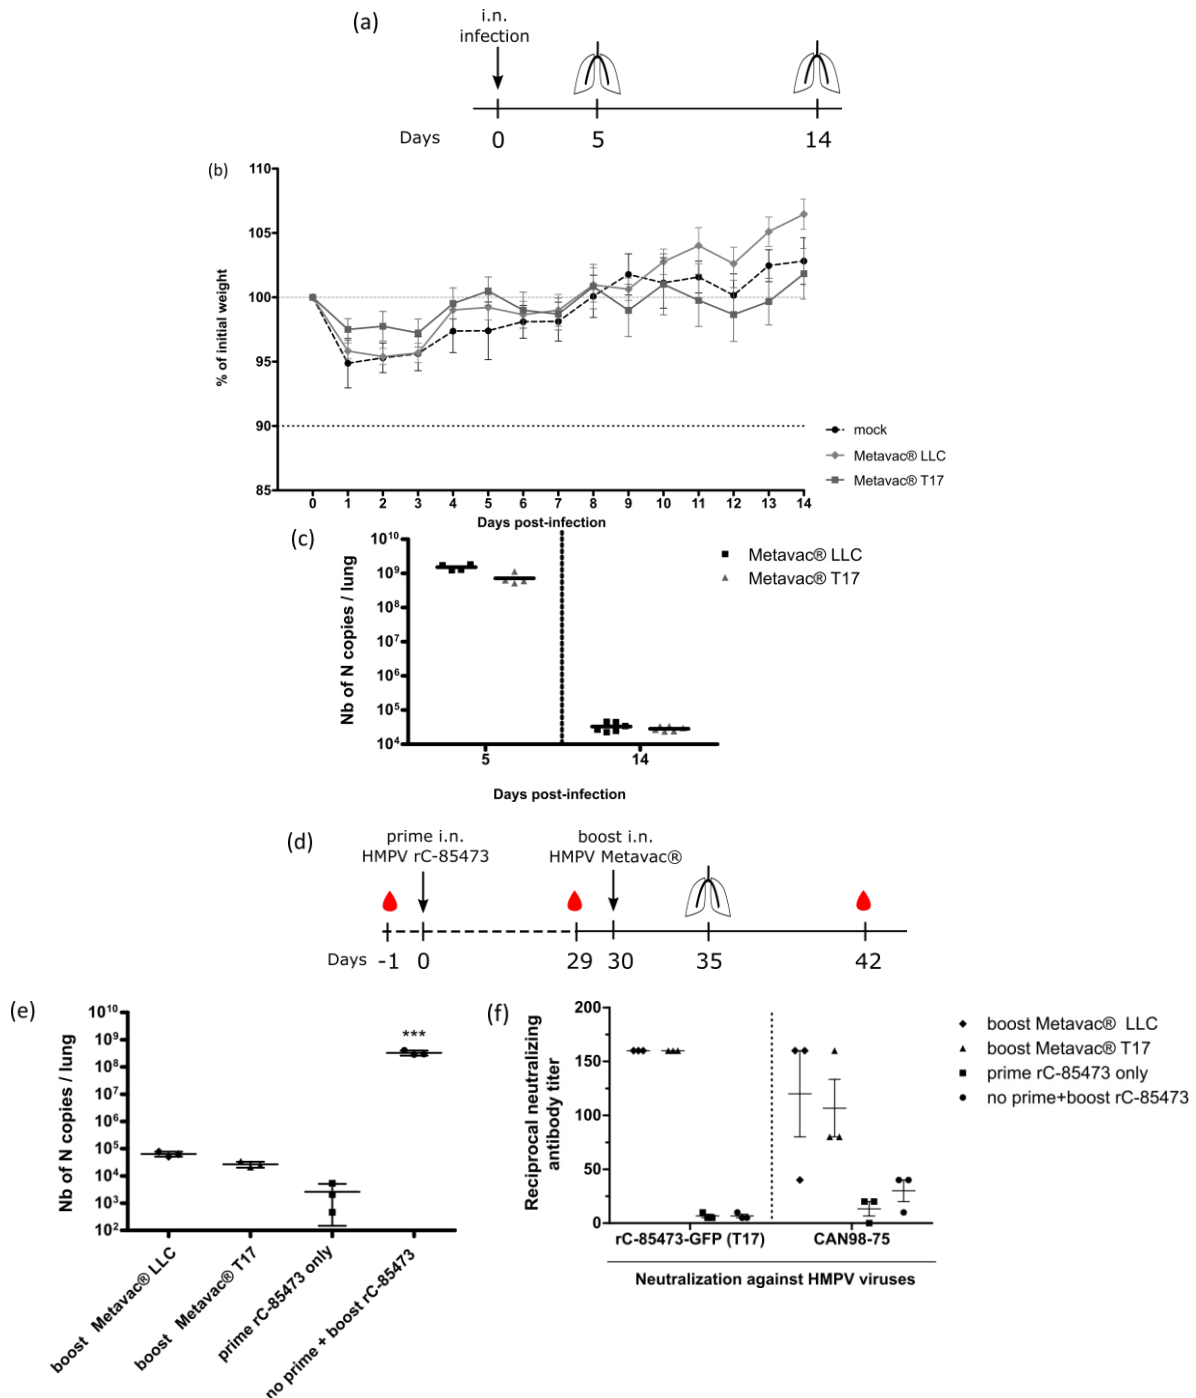

**Figure 6: Evaluation of pulmonary replication and immunogenicity in BALB/c mice after prime or boost**

**infection with the T17-produced HMPV LAV candidate.** (a–c) BALB/c mice were intranasally infected with  $1 \times 10^6$  TCID<sub>50</sub> of the  $\Delta$ SH-rC-85473-GFP virus and monitored for 14 days after infection ( $n = 20$ ), as represented in schematic timeline (a), with weight loss (b,  $n=16$ ) and pulmonary viral titers quantified by RT-qPCR from lungs harvested at 5 dpi (c,  $n = 4$ ). (d–f) BALB/c mice were prime-infected with  $5 \times 10^5$  TCID<sub>50</sub> of the rC-85473-GFP virus, then boost-infected after 30 dpi with  $5 \times 10^5$  TCID<sub>50</sub> of the  $\Delta$ SH-rC-85473-GFP LLC or T17 viruses *via* the intranasal route and monitoring was performed as presented in (d). (e) Pulmonary viral titers quantified by RT-qPCR from lungs harvested at 5 days post-boost ( $n = 3$ ). (f) Induction of neutralizing antibodies by Metavac® viruses in mice 21 days post-boost. Three pools of sera from two mice were tested for neutralization against two WT HMPV strains, the homologous rC-85473-GFP virus produced in DuckCelt®-T17 cells and the heterologous CAN98-75 virus, resulting in three biological replicates per group. One day before prime infection, the naïve status of mice was confirmed by a micronutralization assay from a pool of sera. \*\*\*  $p < 0.001$  when



comparing each group to the no-boost condition using a one-way ANOVA with Dunnett's post-test. i.n.:  
intranasal.

643

644

645

646

647 **Supplementary data**

648 **Supplementary Table 1**

Supplementary Table 1 – Induction of neutralizing antibodies by Metavac® viruses in mice

| Prime infection | Inoculum (log <sub>10</sub> TCID <sub>50</sub> ) | Boost 30-day post-prime | Inoculum (log <sub>10</sub> TCID <sub>50</sub> ) | Reciprocal neutralization titer (n=3) <sup>a</sup> |                    |
|-----------------|--------------------------------------------------|-------------------------|--------------------------------------------------|----------------------------------------------------|--------------------|
|                 |                                                  |                         |                                                  | Against the rC-85473-GFP (LLC) virus               |                    |
|                 |                                                  |                         |                                                  | 29 days post-prime                                 | 21 days post-boost |
| Mock            | -                                                | rC-85473-GFP            | 5.7                                              | < 5                                                | 10                 |
|                 |                                                  | Mock                    | -                                                | < 5                                                | <5                 |
| rC-85473-GFP    | 5.7                                              | Metavac® LLC            | 5.7                                              | 5                                                  | >160               |
|                 |                                                  | Metavac® T17            | 5.7                                              | 5                                                  | >160               |
|                 |                                                  | Mock                    | -                                                | 5                                                  | 5                  |

649 <sup>a</sup>Three pools of sera from two mice were tested for neutralization against the rC-85473-GFP (LLC) virus, resulting in three biological  
 650 replicates per group. One day before prime infection, the naïve status of mice was confirmed by a microneutralization assay from a pool of  
 651 sera.

652  
 653  
 654
